# Supplementary material for: Multiomics of Colorectal Cancer Organoids Reveals Putative Mediators of Cancer Progression Resulting from SMAD4 Inactivation
Source: PubMed Central journal article supplement (PMC9830641; doi:10.1021/acs.jproteome.2c00551), 2022-11-30
Supplement: pr2c00551_si_002.pdf [file pr2c00551_si_002.pdf]

## Supporting Figures.

Figure S1

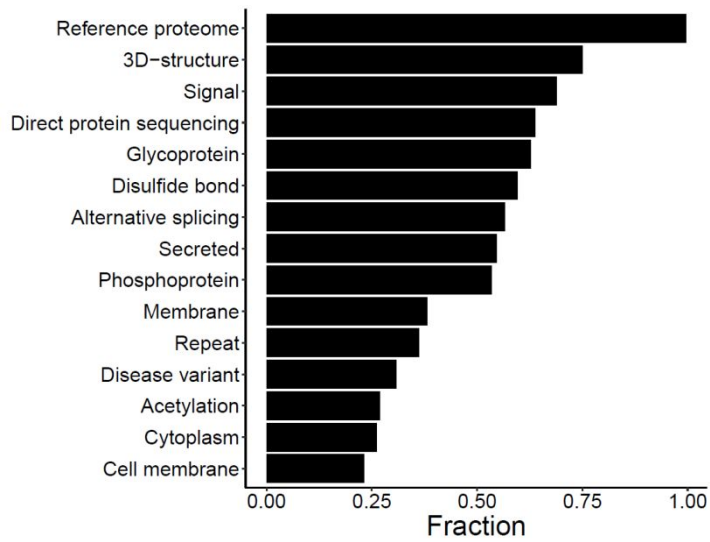

**Figure S1.** Barplot showing the frequency of Uniprot keywords that are associated with identified secreted proteins.
